# Supplementary material for: oPOSSUM-3: Advanced Analysis of Regulatory Motif Over-Representation Across Genes or ChIP-Seq Datasets
Source: PubMed Central journal article supplement (PMC3429929; doi:10.1534/g3.112.003202), 2012-09-01
Supplement: supp_2.9.987_FigureS4.pdf [file supp_2.9.987_FigureS4.pdf]

```

# get all TFBS clusters within each TF family
for each tf_family
  for each tf in tf_family
    search_nearby_for_cluster(tf, new_cluster)
    add new_cluster to cluster_list

# recursively add nearby TFs to form a cluster
function search_nearby_for_cluster(tf, cluster)
{
  # stop if this tf is too far from the cluster being formed
  return if (distance(tf, cluster) > Tmax)

  # go through all nearby neighbours that haven't already been
included
  neighbours = get_neighbours(tf, cluster)
  for each neighbour (neighbours) {
    if (distance(neighbour, cluster) < Tmax)
      add neighbour to cluster

  # check the chain of neighbours and add if they are close
  all_neighbours = search_nearby_for_cluster(neighbour, cluster)
  for each neighbour2 in all_neighbours
    if (distance(neighbour2, cluster) < Tmax)
      add neighbour2 to cluster
}

```

**Figure S4** TFBS clustering algorithm pseudocode.
