# Supplementary material for: oPOSSUM-3: Advanced Analysis of Regulatory Motif Over-Representation Across Genes or ChIP-Seq Datasets
Source: PubMed Central journal article supplement (PMC3429929; doi:10.1534/g3.112.003202), 2012-09-01
Supplement: supp_2.9.987_FigureS5.pdf [file supp_2.9.987_FigureS5.pdf]

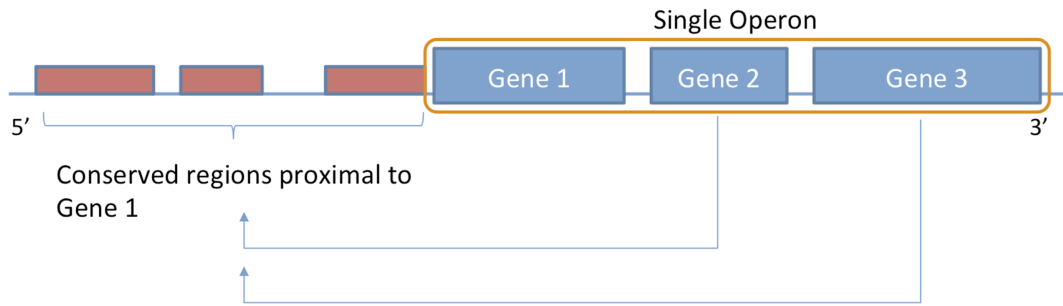

**Figure S5** oPOSSUM system provisions for species with operon structures. Nematode operon annotation is retrieved from Wormbase, a central repository for nematodes. If a gene is found to be a member of an operon, the search region is changed to that belonging to the most 5' gene.
