# Supplementary material for: oPOSSUM-3: Advanced Analysis of Regulatory Motif Over-Representation Across Genes or ChIP-Seq Datasets
Source: PubMed Central journal article supplement (PMC3429929; doi:10.1534/g3.112.003202), 2012-09-01
Supplement: supp_2.9.987_FigureS6.pdf [file supp_2.9.987_FigureS6.pdf]

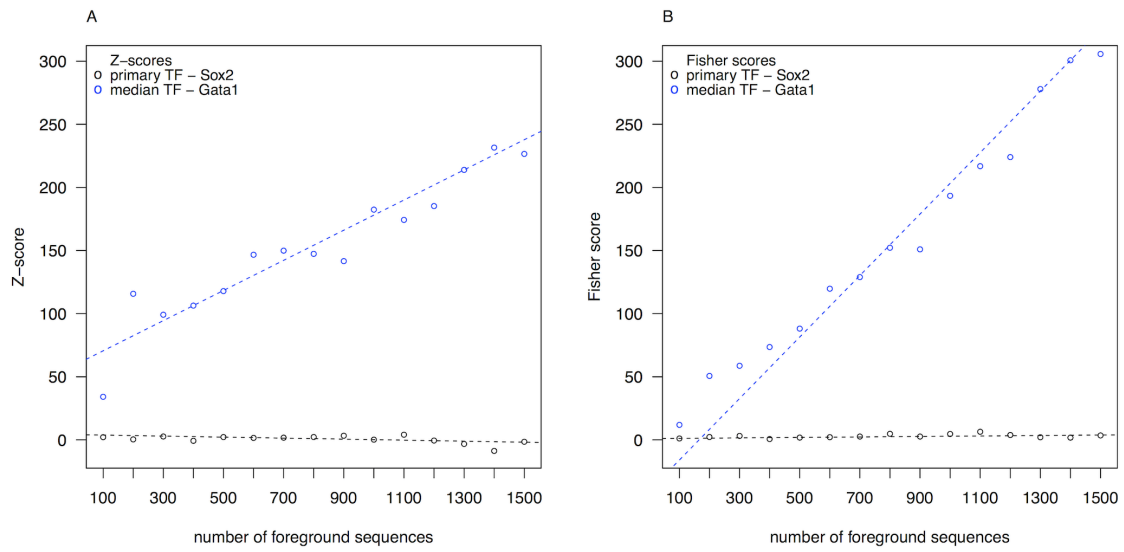

**Figure S6** The range of enrichment scores increases as the number of foreground sequences increases. We performed SSA on a series of foregrounds ranging from 100-1500 sequences and corresponding GC composition backgrounds. The impact of foreground size on the two enrichments scores is linear, as shown in (A) Z-score and (B) Fisher score. The plots display scores for i) the primary TF – Sox2, and ii) the median TF – Gata1.
