# Supplementary material for: oPOSSUM-3: Advanced Analysis of Regulatory Motif Over-Representation Across Genes or ChIP-Seq Datasets
Source: PubMed Central journal article supplement (PMC3429929; doi:10.1534/g3.112.003202), 2012-09-01
Supplement: supp_2.9.987_TableS1.pdf [file supp_2.9.987_TableS1.pdf]

**Table S1 Muscle reference gene collection.** These are human genes known to be muscle-specific, and have been found to be associated with muscle-specific enhancer regions.

| Gene Symbol | Ensembl ID      | Reference (PMID)  |
|-------------|-----------------|-------------------|
| Aldoa       | ENSG00000149925 | 10369770, 7473711 |
| DMD         | ENSG00000198947 | 11259421          |
| MB          | ENSG00000198125 | 11279187          |
| MEF2C       | ENSG00000081189 | 11714687          |
| MYH4        | ENSG00000141048 | 10329954          |
| MYH3        | ENSG00000109063 | 11971910          |
| SLC2A4      | ENSG00000181856 | 12893821          |
| ACHA        | ENSG00000138435 | 9571041           |
| CHRNB1      | ENSG00000170175 | 9571041           |
| ACHG        | ENSG00000196811 | 9571041           |
| ACHD        | ENSG00000135902 | 9571041           |
| ACHE        | ENSG00000108556 | 9571041           |
| ACTC        | ENSG00000159251 | 9571041           |
| CKM         | ENSG00000104879 | 9571041           |
| DES         | ENSG00000175084 | 9571041           |
| MYF6        | ENSG00000111046 | 9571041           |
| MYOD        | ENSG00000129152 | 9571041           |
| MYOG        | ENSG00000122180 | 9571041           |
| MYL1        | ENSG00000168530 | 9571041           |
| MYL4        | ENSG00000198336 | 9571041           |
| TNCC1       | ENSG00000114854 | 9571041           |
| TNNI1       | ENSG00000159173 | 9571041           |

|       |                 |         |
|-------|-----------------|---------|
| MYH7  | ENSG00000092054 | 9571041 |
| MYH6  | ENSG00000197616 | 9571041 |
| ACTC1 | ENSG00000143632 | 9571041 |

---
